# Supplementary material for: Ni3S2 nanorods/Ni foam composite electrode with low overpotential for electrocatalytic oxygen evolution
Source: Royal Society of Chemistry journal article supplement (doi:10.1039/c3ee41572d), 2013-01-01
Supplement: c3ee41572d.pdf [file c3ee41572d.pdf]

[Electronic Supplementary Information]

**Ni<sub>3</sub>S<sub>2</sub> Nanorods/Ni Foam Composite Electrode with Low Overpotential for  
Electrocatalytic Oxygen Evolution**

Weijia Zhou,<sup>a,b,c</sup> Xue-Jun Wu,<sup>a</sup> Xiehong Cao,<sup>a</sup> Xiao Huang,<sup>a</sup> Chaoliang Tan,<sup>a</sup> Jian  
Tian,<sup>c</sup> Hong Liu,<sup>\*c,d</sup> Jiyang Wang,<sup>c</sup> Hua Zhang<sup>\*a</sup>

<sup>a</sup>School of Materials Science and Engineering, Nanyang Technological University, 50  
Nanyang Avenue, Singapore 639798, Singapore, E-mail: HZhang@ntu.edu.sg,  
Website: <http://www.ntu.edu.sg/home/hzhang/>

<sup>b</sup>New Energy Research Institute, School of Environment and Energy, South China  
University of Technology, Guangzhou Higher Education Center, Guangzhou, 510006,  
China

<sup>c</sup>State Key Laboratory of Crystal Materials, Center of Bio & Micro/nano Functional  
Materials, Shandong University, 27 Shandan Road, Jinan 250100, China, E-mail:  
[hongliu@sdu.edu.cn](mailto:hongliu@sdu.edu.cn)

<sup>d</sup>Beijing Institute of Nanoenergy and Nanosystems, Chinese Academy of Science,  
Beijing 100864, P. R. China

## Experimental section

*Growth of Ni<sub>3</sub>S<sub>2</sub>/Ni hybrid structure:* Ni<sub>3</sub>S<sub>2</sub> nanorods on Ni foam, referred to as Ni<sub>3</sub>S<sub>2</sub>/Ni, were prepared by a simple one-step hydrothermal process. A piece of Ni foam was wrapped by Teflon tape with exposure area of ~1 cm<sup>2</sup>, and immersed into a Teflon-lined stainless steel autoclave containing a 20 mL aqueous solution of 320 mg thioacetamide (TAA, C<sub>2</sub>H<sub>5</sub>NS). Then, the autoclave was sealed for hydrothermal reaction at 180 °C for 2, 4 and 6 h to obtain the Ni<sub>3</sub>S<sub>2</sub>/Ni with different morphologies, e.g. nanoparticles, short nanorods and long nanorods, respectively. After the autoclave was cooled down to room temperature, the samples were rinsed with copious distilled water and then dried in an electric oven at 60 °C for 12 h.

*Characterization:* Field emission scanning electron microscopy (FESEM, Model JSM-7600F, JEOL Ltd., Tokyo, Japan) was used to characterize the morphologies and size of the synthesized samples. Transmission electron microscopy (TEM) images were carried out with a JOEL JEM 2100F microscope. X-ray powder diffraction (XRD) patterns of the samples were recorded on a Bruke D8 Advance powder X-ray diffractometer with Cu K $\alpha$  ( $\lambda = 0.15406$  nm). X-ray photoelectron spectroscopy (XPS) was performed using an ESCALAB 250.

## The detailed electrochemical measurement

Electrochemical measurements were performed on an electrochemical workstation (CHI 760C, CH Instruments Inc., Shanghai) using a three-electrode mode

in 0.1 M KOH aqueous solution (pH = ~13). The reference electrode and counter electrode were Ag/AgCl electrode (saturated KCl) and platinum wire, respectively. The Ni<sub>3</sub>S<sub>2</sub>/Ni electrodes were directly used as the anodes for electrochemical characterizations. The mass of Ni<sub>3</sub>S<sub>2</sub> nanorods grown on the Ni foam was calculated as following: the weight increment ( $x$  mg) of Ni foam can be directly weighted after the synthesis of Ni<sub>3</sub>S<sub>2</sub> on Ni foam.  $m_{Ni_3S_2} = x \text{ mg} \times (M_{Ni_3S_2}/2M_S) = x \text{ mg} \times (240/64) = 3.75x \text{ mg}$ , where M is the molecular weight or atomic weight. For Ni<sub>3</sub>S<sub>2</sub>/Ni electrode obtained by 4 h, the loading mass of Ni<sub>3</sub>S<sub>2</sub> is about 37 mg/cm<sup>2</sup>. Prior to the experiments, the Ni<sub>3</sub>S<sub>2</sub>/Ni electrodes were sealed on all edges except for the working surface area (~0.25 cm<sup>2</sup>) with epoxy resin. The current densities were evaluated in terms of the geometric surface area of the Ni<sub>3</sub>S<sub>2</sub>/Ni electrodes.

*Polarization curves:* Before the electrochemical measurement, the electrolyte (0.1 M KOH) was degassed by bubbling oxygen for 30 min. The polarization curves were obtained by sweeping the potential from 0 to 0.8 V (vs. Ag/AgCl) with a sweep rate of 5 mV/s. Reverse scans were operated by CV in a potential range of 0 to 0.6 V at a constant scan rate of 10 mV/s.

For comparison on Ni foam electrodes, working electrodes comprised of 0.5 cm × 0.5 cm pieces of nickel foam loaded with 20 wt% Pt/C (37 mg/cm<sup>2</sup>). 9.3 mg of 20 wt% Pt/C was dispersed in 10 mL distilled water and 20 μL Nafion solution (5 wt%, Sigma-Aldrich) with 30 min sonication treatment followed by deposition of this solution on Ni foam electrode, and final evaporation of the water.

For comparison on GC electrodes, all samples including Ni<sub>3</sub>S<sub>2</sub>, Fe<sub>2</sub>O<sub>3</sub>, Co<sub>3</sub>O<sub>4</sub>, MnO<sub>2</sub> and 20 wt% Pt/C, were loaded on GC electrode for electrochemical measurement. Ni<sub>3</sub>S<sub>2</sub> nanorods were obtained from Ni<sub>3</sub>S<sub>2</sub>/Ni by sonication treatment. Except for Ni<sub>3</sub>S<sub>2</sub>, all above reference samples were purchased from Sigma-Aldrich Co. LLC. In short, 4 mg of catalyst powder was dispersed in 1 ml of 4:1 (v/v) water/ethanol mixed solvent with 10 μl Nafion solution, then the mixture was ultrasonicated for 30 min. Next, 4 μl of the above solution was transferred onto the GC disk, leading to the catalyst loading ~0.22 mg/cm<sup>2</sup>. Finally, the as-prepared catalyst film was dried at room temperature.

The thermodynamic potential for 4OH<sup>-</sup> → 2H<sub>2</sub>O + O<sub>2</sub> + 4e<sup>-</sup> in 0.1 M KOH (pH =13):

$$\begin{aligned} E^{\circ}(\text{OH}^-/\text{O}_2) &= 1.228 - 0.0591 \times 13 \\ &= 0.46 \text{ V (vs. SHE)} \\ &= 0.46 - 0.197 = 0.263 \text{ V (vs. Ag/AgCl)} \end{aligned}$$

Results of polarization studies were compensated by  $\eta$  (V) =  $V_{\text{appl}} - 0.263$ , where  $\eta$  is the corrected overpotential,  $V_{\text{appl}}$  is the applied potential, and 0.263 is the theoretical onset potential of oxygen evolution (vs. Ag/AgCl).

*Stability test:* The accelerated stability tests were performed in O<sub>2</sub>-saturated 0.1 M KOH at room temperature, which was tested by cyclic voltammetry (CV) between 0 and 0.6 V (vs. Ag/AgCl) at a sweep rate of 100 mV/s for given number of cycles. Amperometric current-time curves of electrodes were performed at 0.5 V and 0.6 V

(vs. Ag/AgCl), respectively.

*Oxygen production test:* The oxygen production of Ni<sub>3</sub>S<sub>2</sub>/Ni electrode was applied with potential at +0.5 V. The methylene blue was used to qualitatively detect dissolved oxygen in 0.1 M KOH aqueous solution. The color of electrolyte would change from transparent (oxygen-free) to blue (oxygen). The gas production rate from Ni<sub>3</sub>S<sub>2</sub>/Ni electrode was quantificationally measured by gas chromatography (GC-2060F, LuNan Analytical Instrument, LTD, China).

## Supplementary Figures

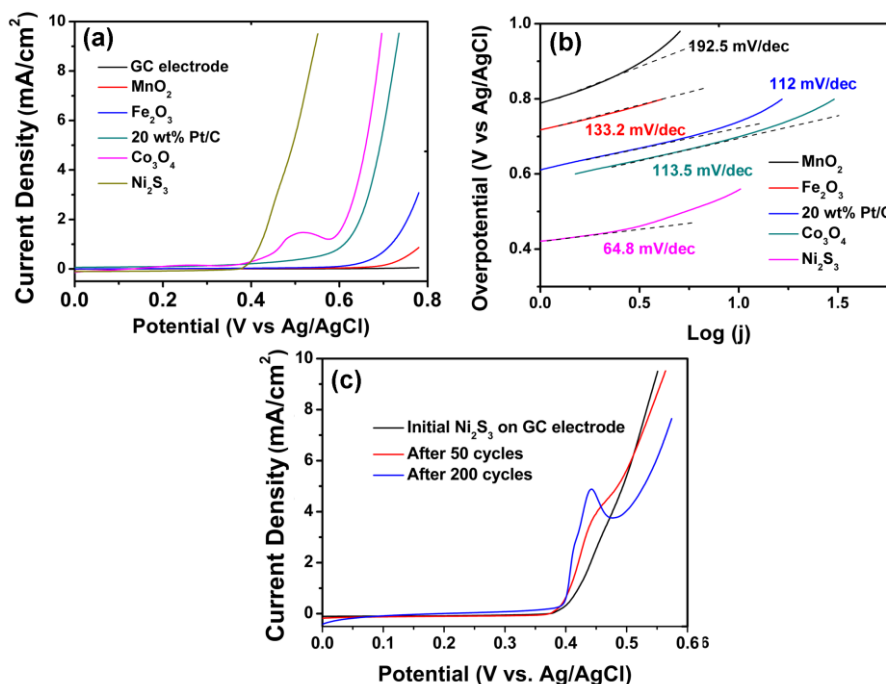

**Fig. S1** (a) Polarization curves for OER on bare GC electrode and modified GC electrodes with the Ni<sub>3</sub>S<sub>2</sub> nanorods, 20 wt % Pt/C, MnO<sub>2</sub>, Fe<sub>2</sub>O<sub>3</sub>, and Co<sub>3</sub>O<sub>4</sub>, respectively. (b) Tafel plot (overpotential versus log current) derived from a). (c) OER polarization curves for Ni<sub>3</sub>S<sub>2</sub> nanorods loaded on GC electrode before and after 50, 200 cycles of accelerated stability test, respectively.

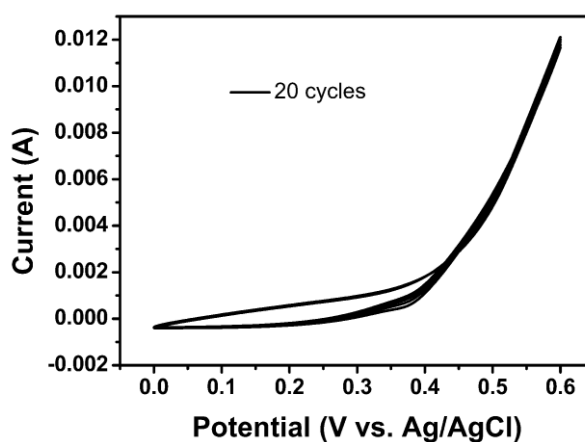

**Fig. S2** Cyclic voltammograms of Ni<sub>3</sub>S<sub>2</sub>/Ni electrode in a potential range of 0 to 0.6 V at a constant scan rate of 10 mV/s.

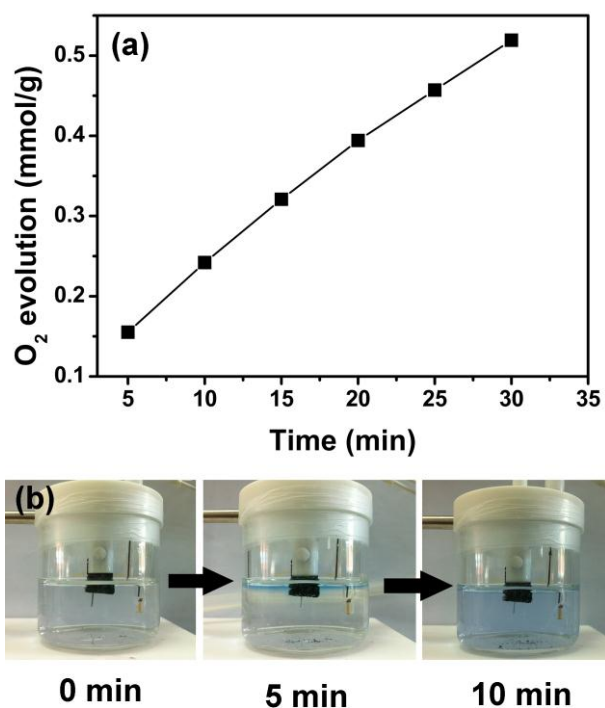

**Fig. S3** (a) The oxygen production activity of  $\text{Ni}_3\text{S}_2/\text{Ni}$  electrode with applied potential at +0.5 V. (b) The bubbles formed on the  $\text{Ni}_3\text{S}_2/\text{Ni}$  electrode and the color change of electrolyte.

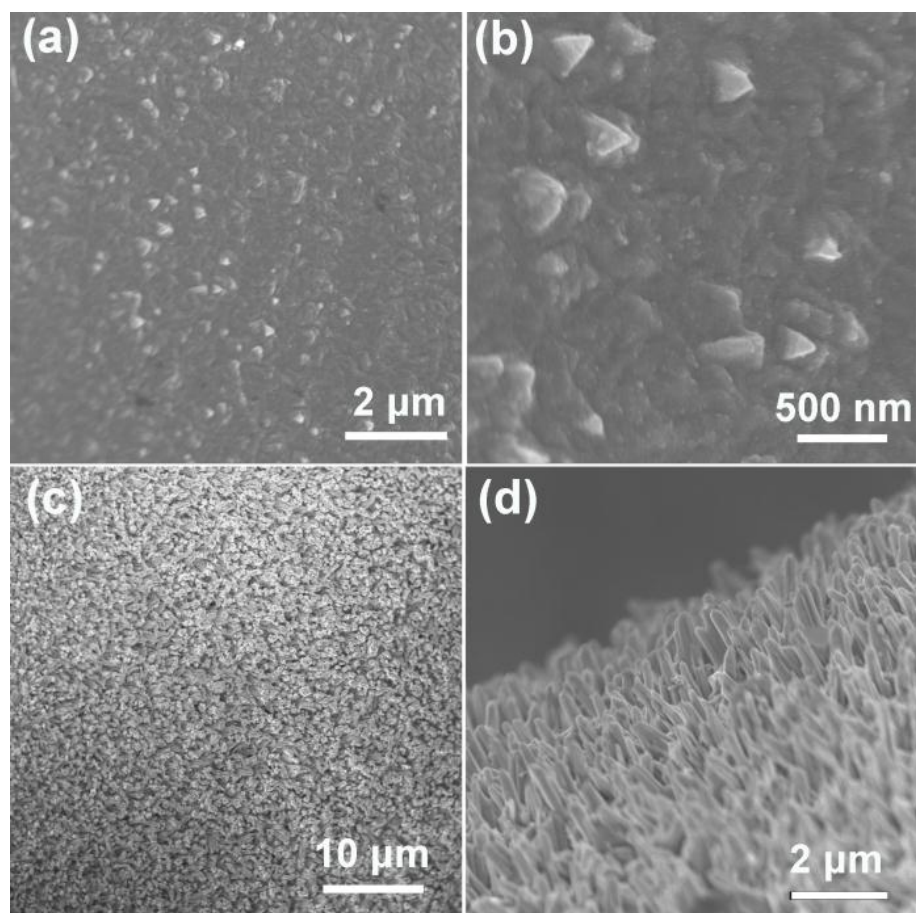

**Fig. S4** SEM images of the  $\text{Ni}_3\text{S}_2/\text{Ni}$  obtained by different hydrothermal reaction time:

(a, b) 2 h and (c, d) 6 h.

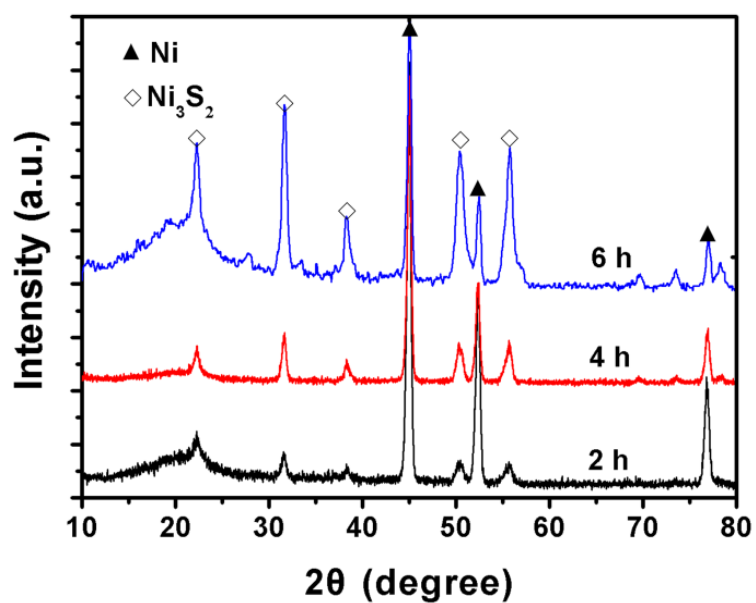

**Fig. S5** XRD result of the  $\text{Ni}_3\text{S}_2/\text{Ni}$  obtained by different hydrothermal reaction time.



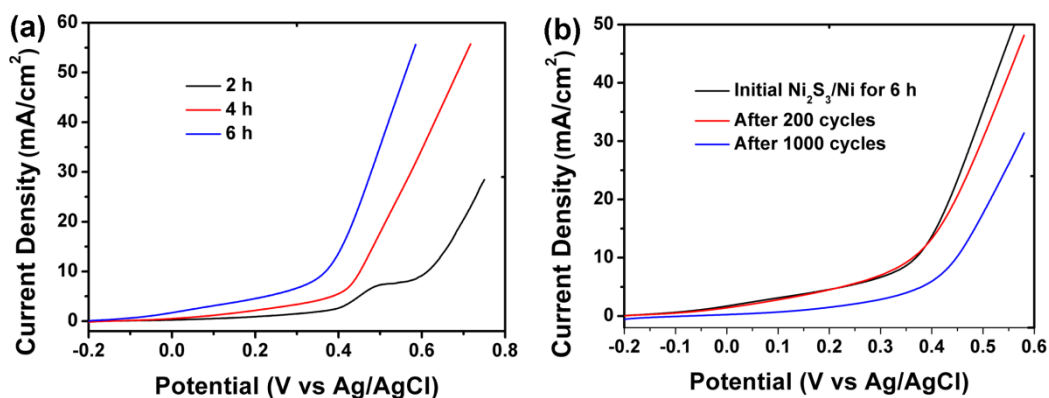

**Fig. S6** (a) OER polarization curves of the Ni<sub>3</sub>S<sub>2</sub>/Ni electrodes obtained by different hydrothermal reaction time. (b) OER polarization curves of Ni<sub>3</sub>S<sub>2</sub>/Ni electrodes (6 h) before and after the different cycles of accelerated stability test.

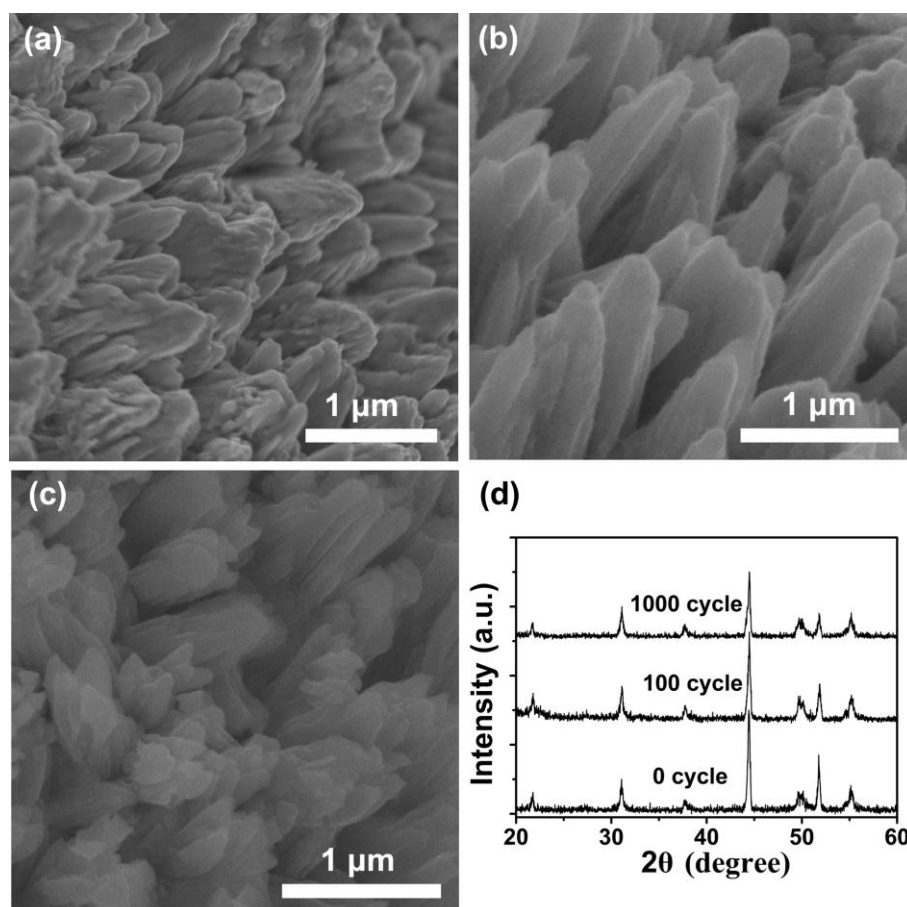

**Fig. S7** SEM images of the Ni<sub>3</sub>S<sub>2</sub> nanorods/Ni foam composite electrodes: (a) before

catalytic reaction, (b) after 100 cycles and (c) after 1000 cycles of catalytic reaction,

(d) XRD results of the corresponding composite electrodes.
